# Supplementary material for: Crystal engineering of o-carboranyl alcohols: syntheses, crystal structures and thermal properties
Source: Royal Society of Chemistry journal article supplement (doi:10.1039/c0ce00169d), 2010-01-01
Supplement: c0ce00169d.pdf [file c0ce00169d.pdf]

# **Crystal Engineering of *o*-Carboranyl Alcohols: Synthesis, Crystal Structures and Thermal Properties**

Vincent Terrasson,<sup>[a,b]</sup> Yolanda García,<sup>[a]</sup> Pau Farràs,<sup>[a]</sup> Francesc Teixidor,<sup>[a]</sup> Clara Viñas,<sup>[a]</sup> José Giner Planas,<sup>\*[a]</sup> Damien Prim,<sup>[b]</sup> Mark E. Light,<sup>[c]</sup> and Michael B. Hursthouse<sup>[c]</sup>

[a] Dr. J. Giner Planas, Dr. Y. García, Dr. P. Farràs, Prof. Dr. F. Teixidor, Prof. Dr. C. Viñas, Institut de Ciència de Materials de Barcelona, Campus U.A.B. 08193 Bellaterra, Spain. Fax: +34 93 580 57 29; Tel: +34 93 580 18 53; E-mail: jginerplanas@icmab.es

[b] Dr. V. Terrasson, Prof. Dr. D. Prim, Institut Lavoisier de Versailles-UMR CNRS 8180

Université de Versailles-Saint-Quentin-en-Yvelines, 45 avenue des Etats-Unis, 78035 Versailles, France, Fax: (+33) 1 39 25 44 52;

[c] Dr. M. E. Light, Prof. Dr. M. B. Hursthouse, School of Chemistry, University of Southampton, Highfield, Southampton. UK SO17 1BJ; Fax: +44 2380596723; Tel: +44 2380596721.

**Electronic Supplementary Material for CrystEngComm**

### IR Spectrum (KBr) for compound (1)

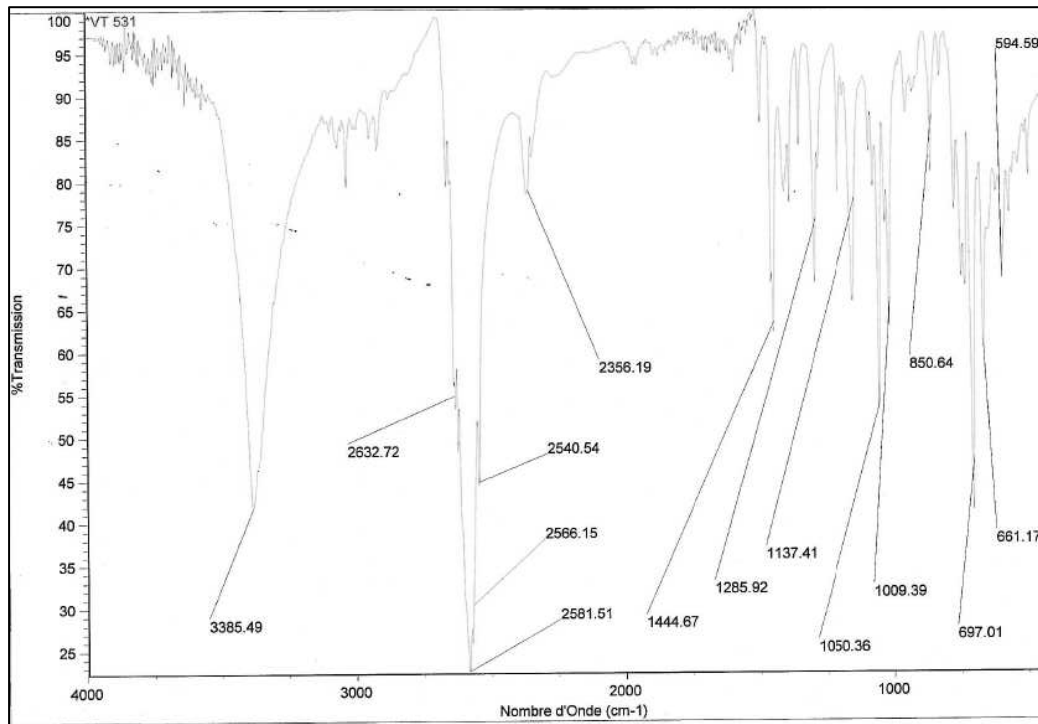

### IR Spectrum (KBr) for compound (2)

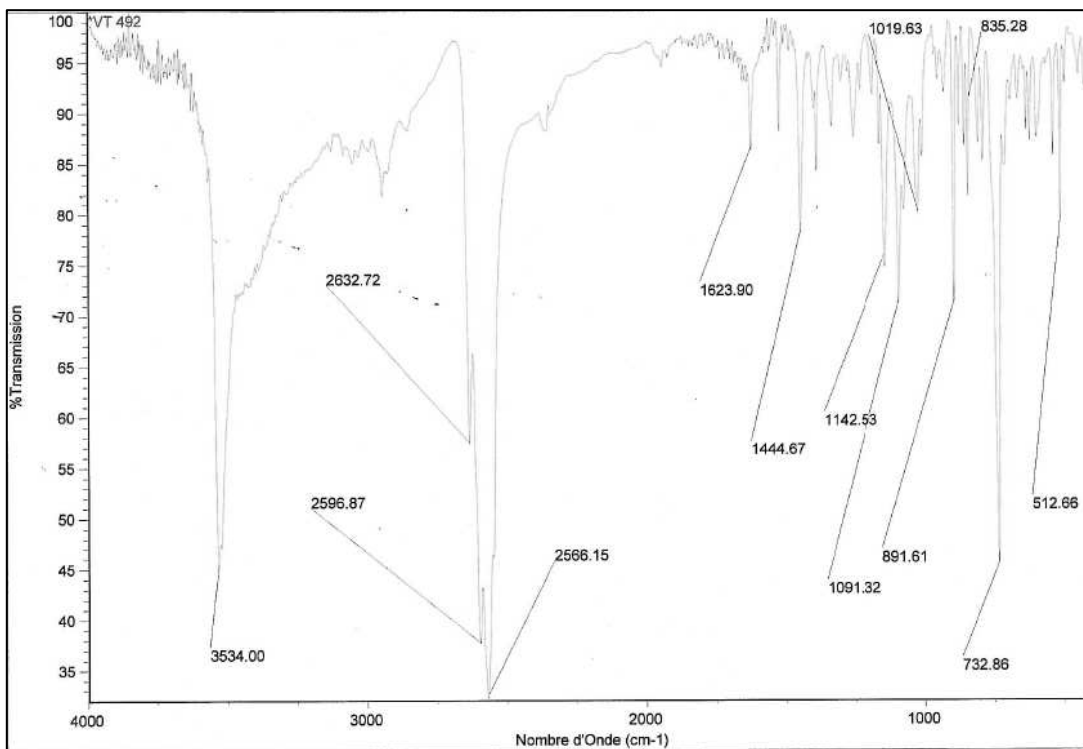

### IR Spectrum (KBr) for compound (3)

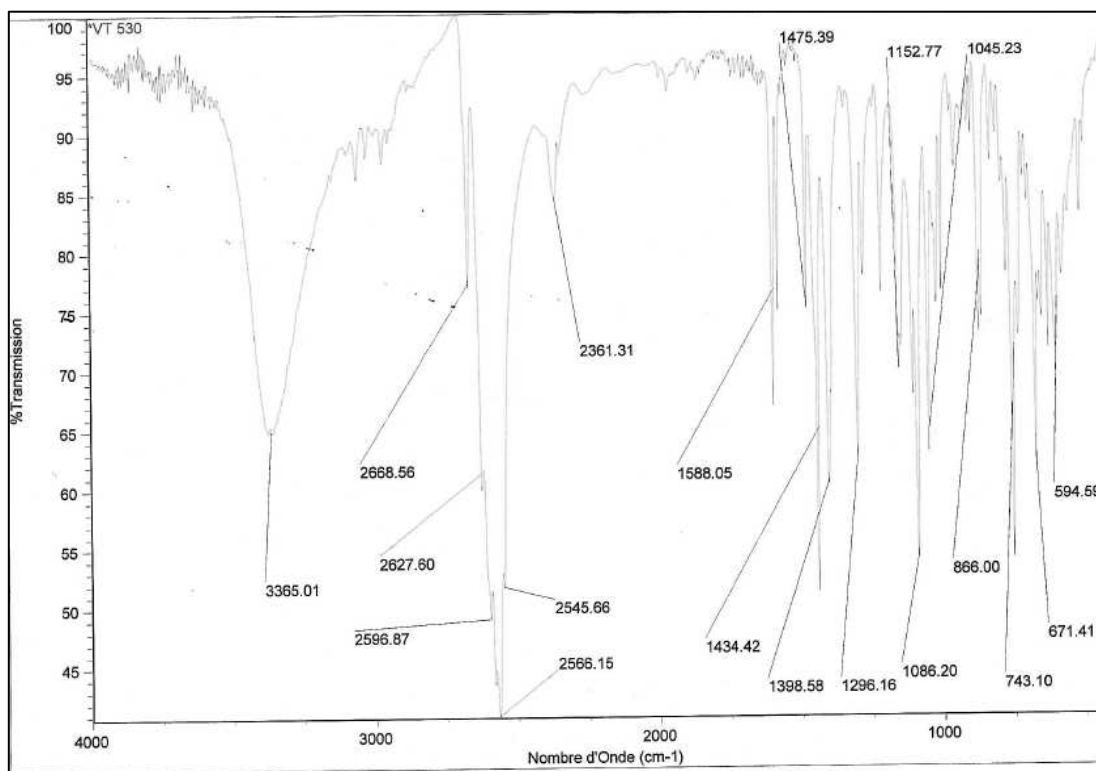

### IR Spectrum (KBr) for compound (4)

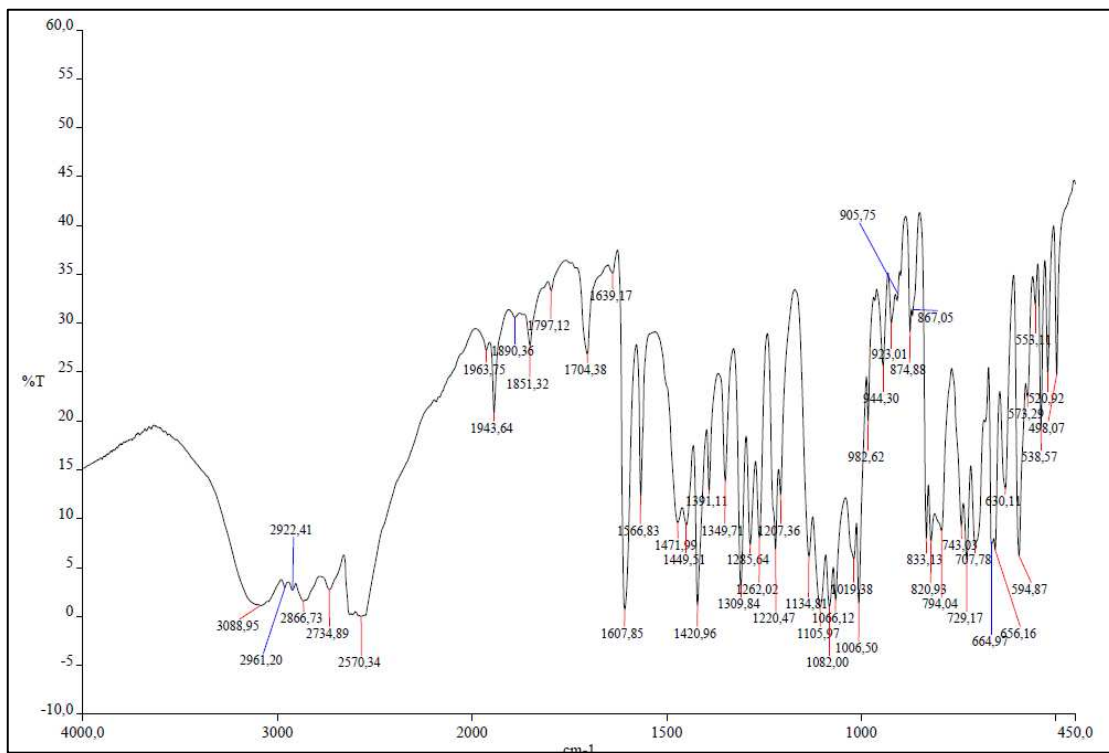

### IR Spectrum (KBr) for compound (5)

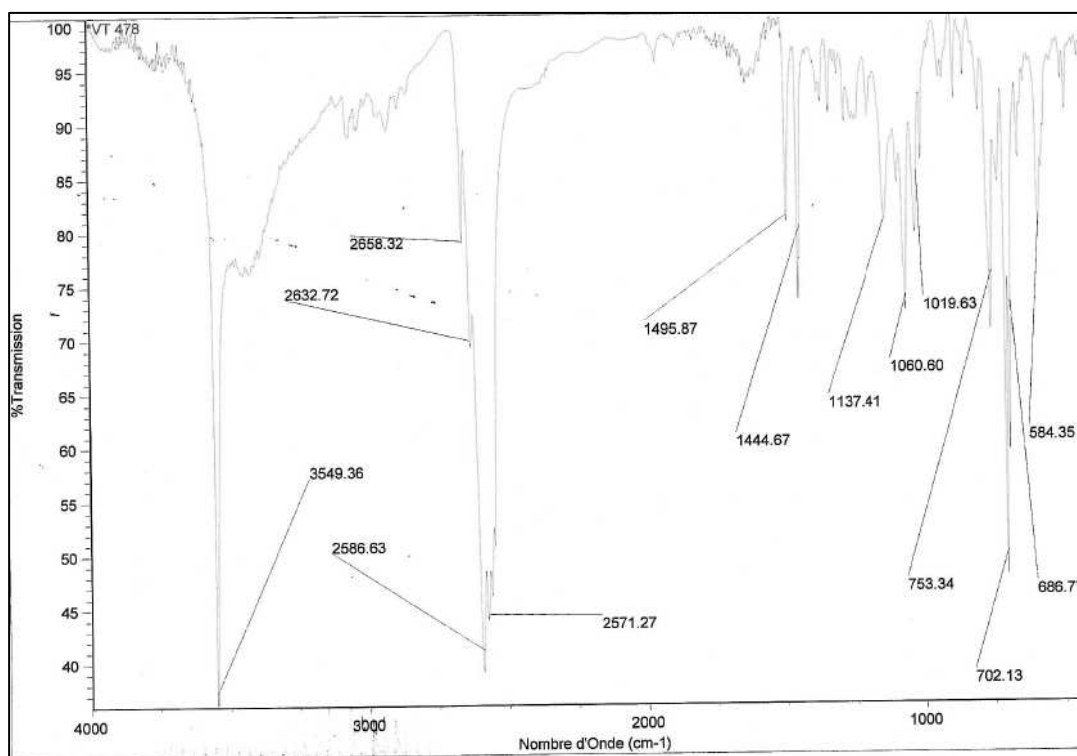

### IR Spectrum (KBr) for compound (6)

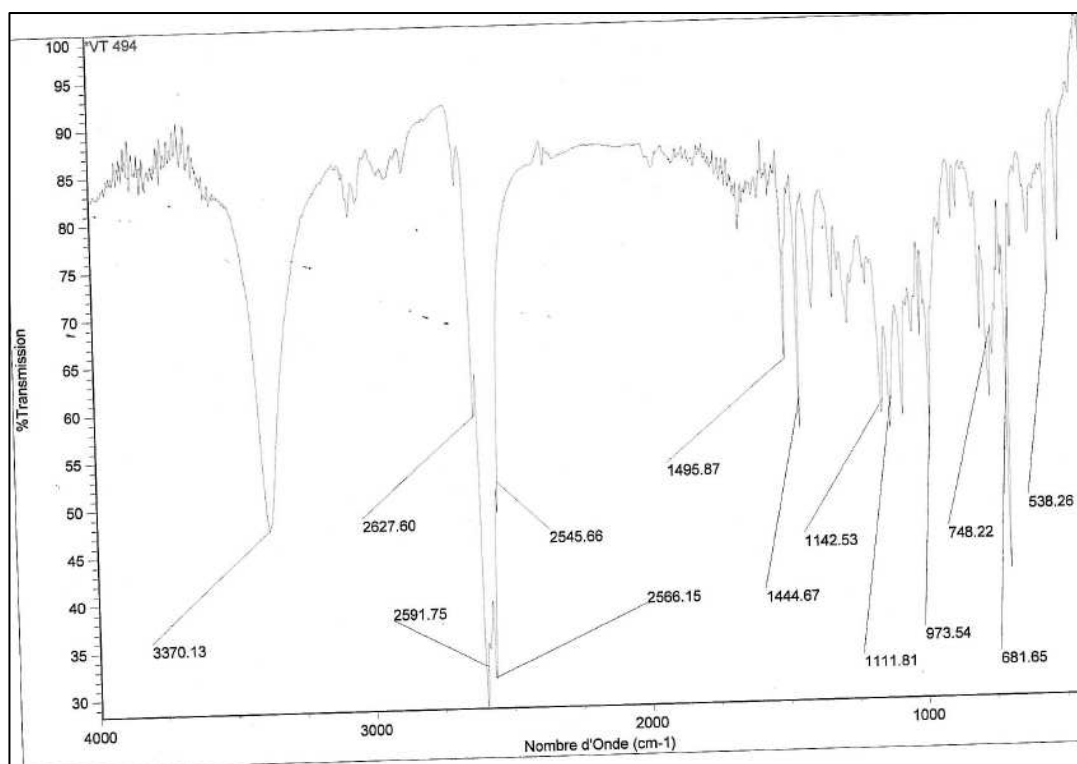

### IR Spectrum (KBr) for compound (7)

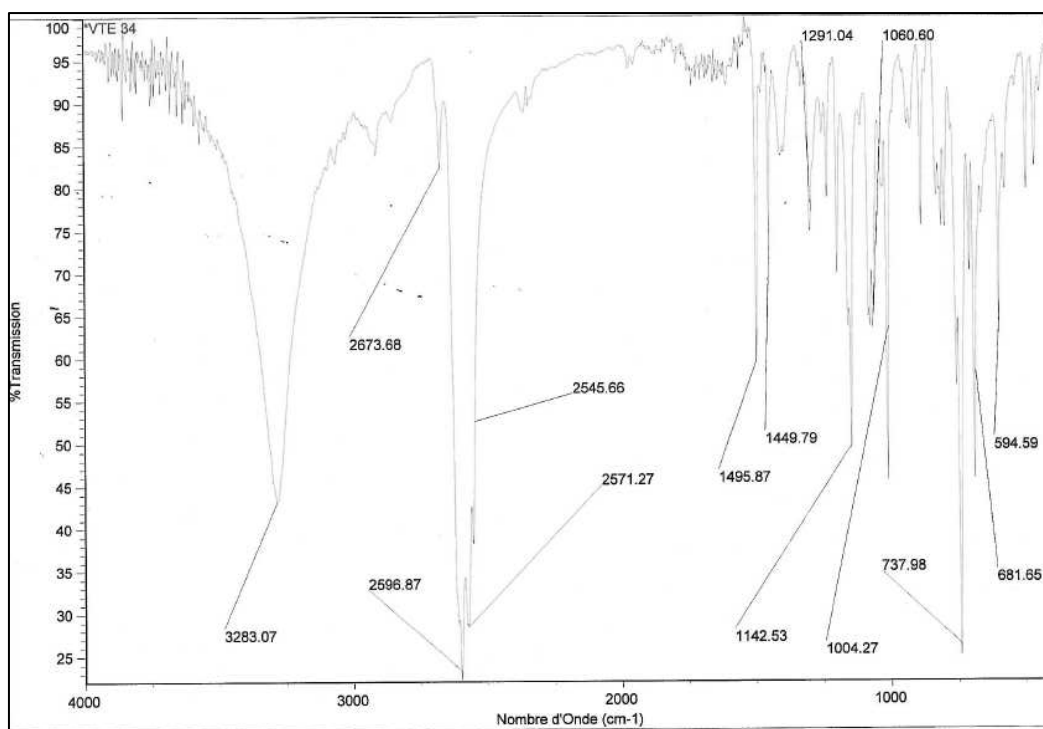

# TGA and DSC for compound (1)

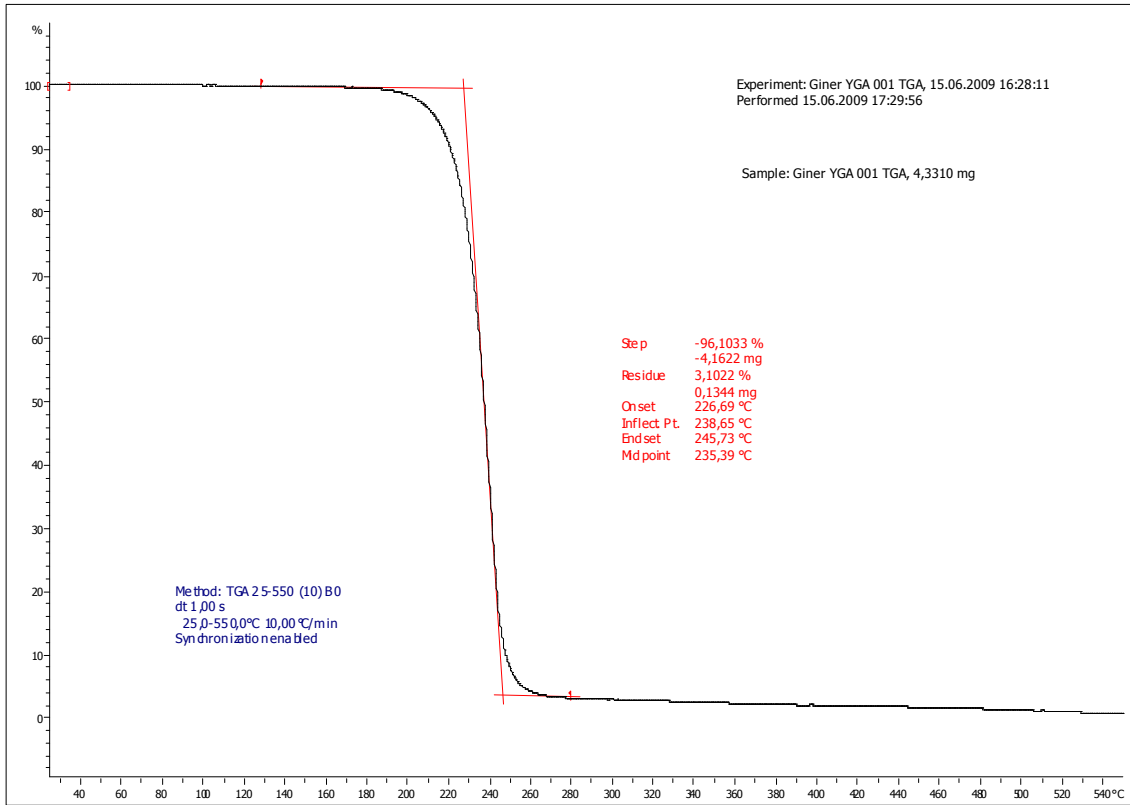

Lab: IQAC

STAR® SW 9.20

^exo

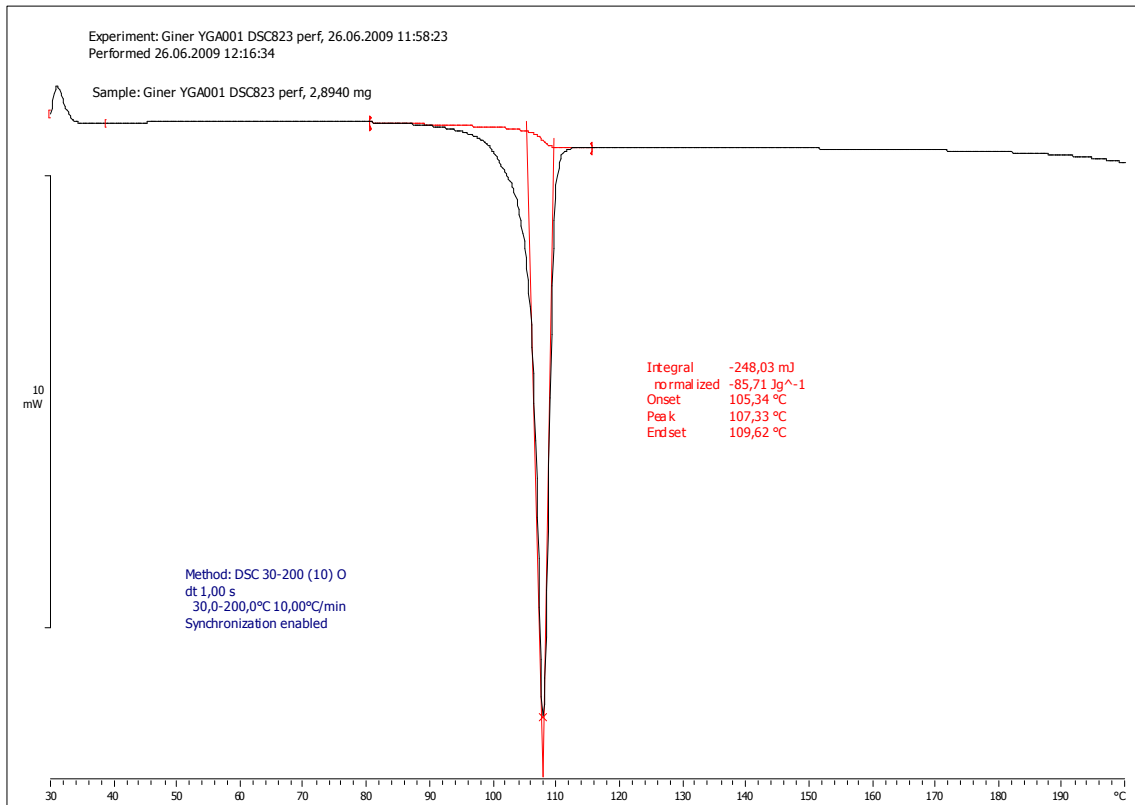

Lab: IQAC

STAR® SW 9.20

## TGA and DSC for compound (2)

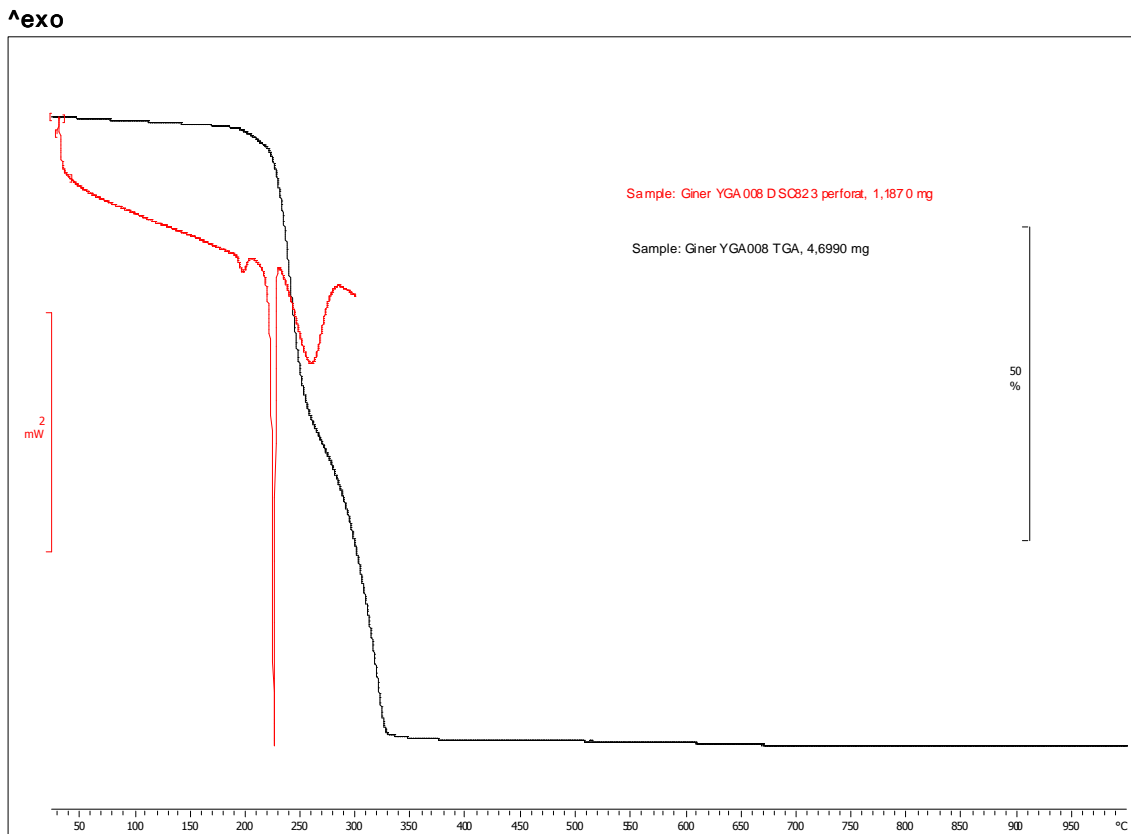

Lab: IQAC

STAR® SW 9.20

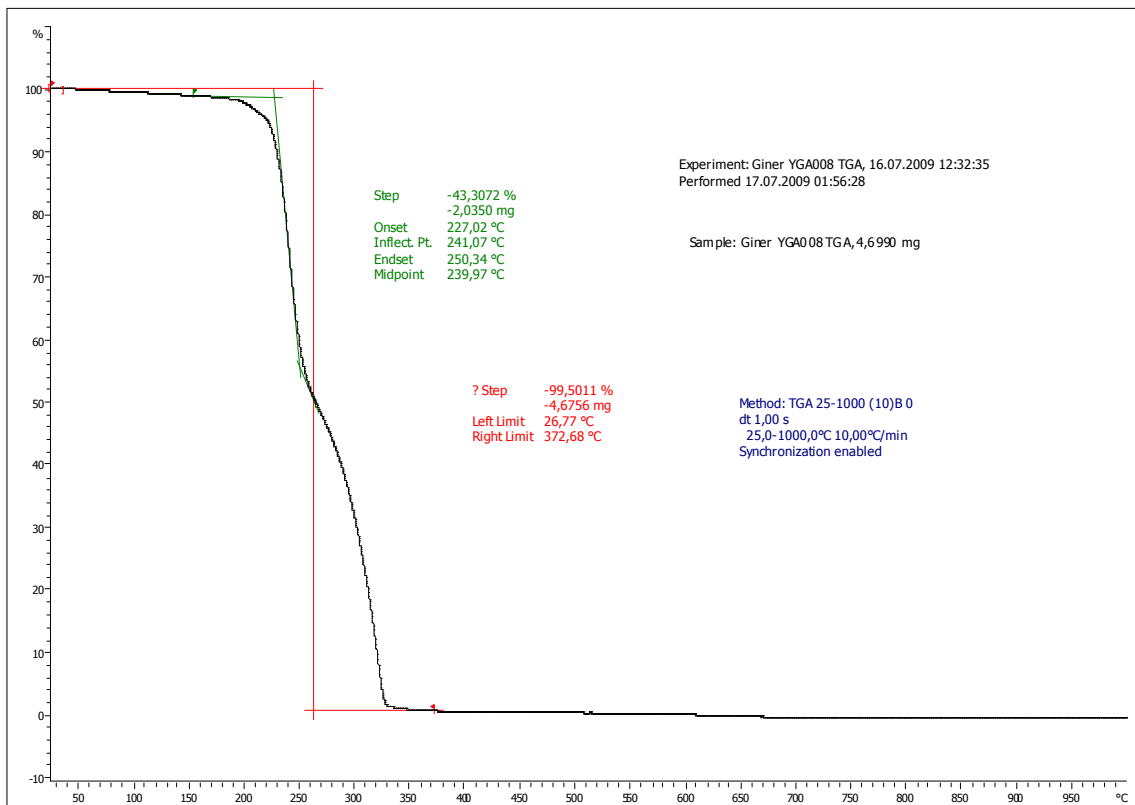

Lab: IQAC

STAR® SW 9.20

### TGA and DSC for compound (3)

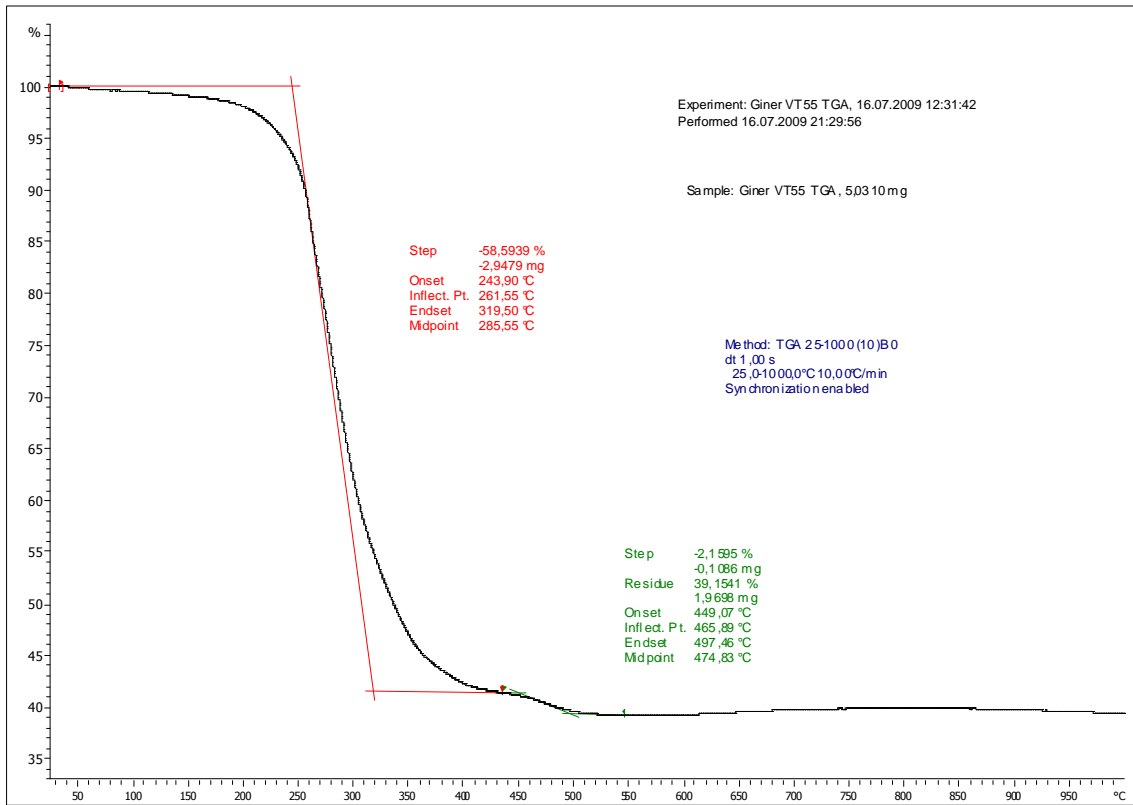

^exo

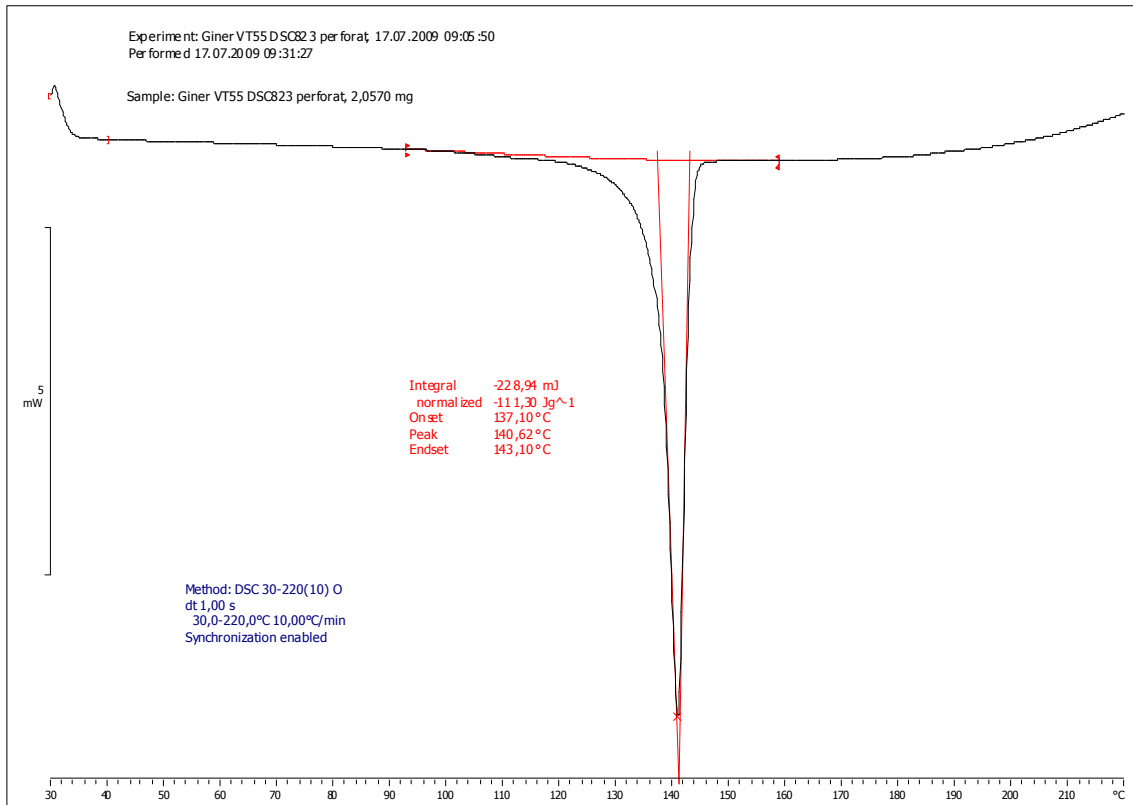



## TGA and DSC for compound (4)

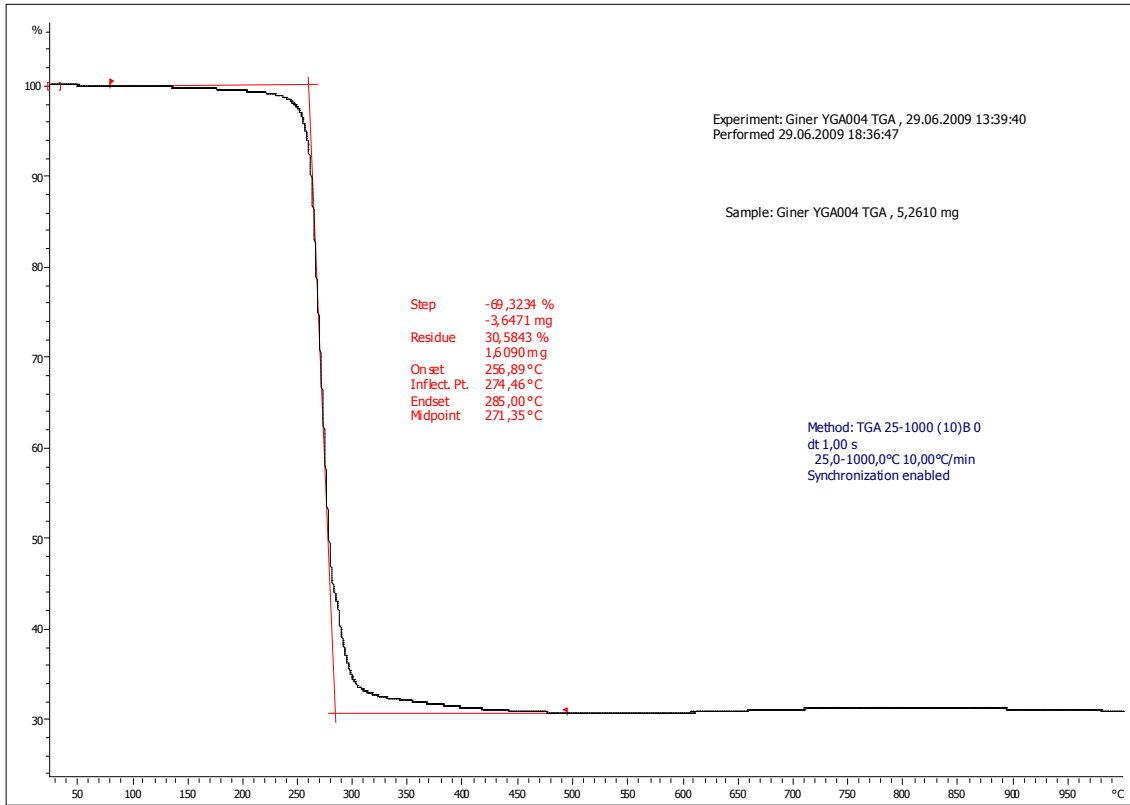

Lab: IQAC

STAR<sup>®</sup> SW 9.20

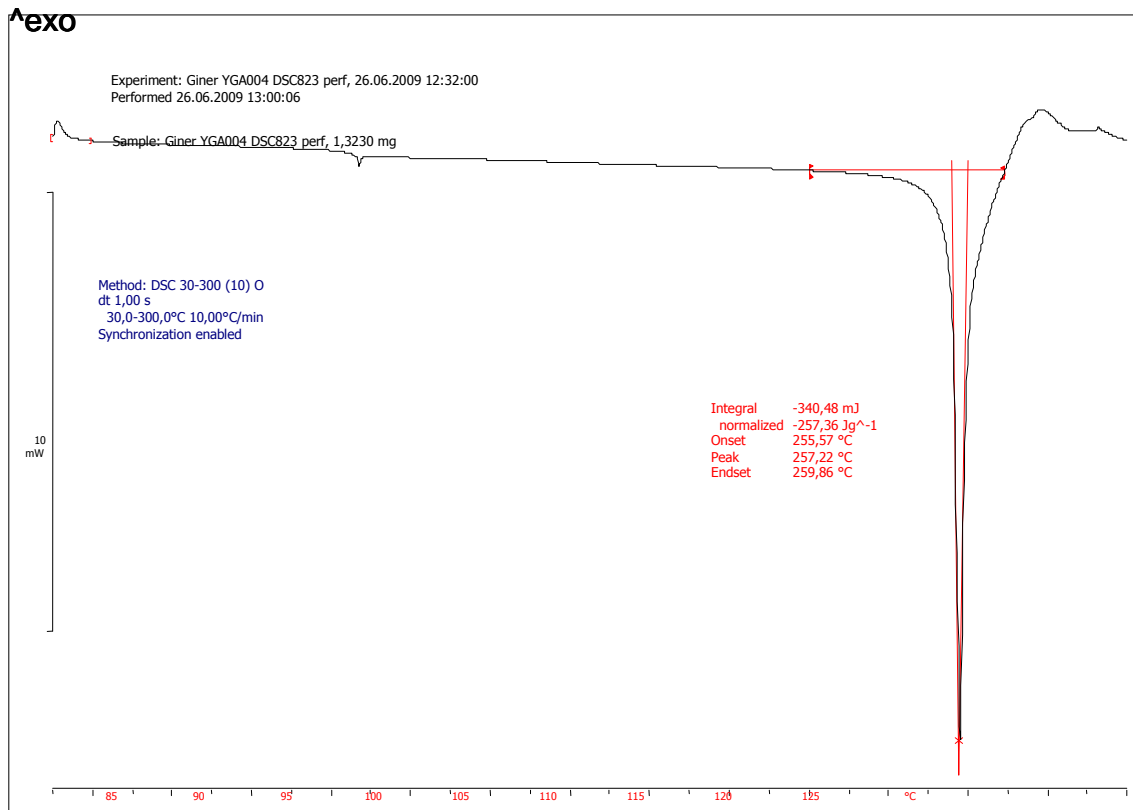

Lab: IQAC

STAR<sup>®</sup> SW 9.20

Electron density difference map showing the clear discrete position of the hydrogen peak between the donor (O1) and the acceptor (N1) in **3**.

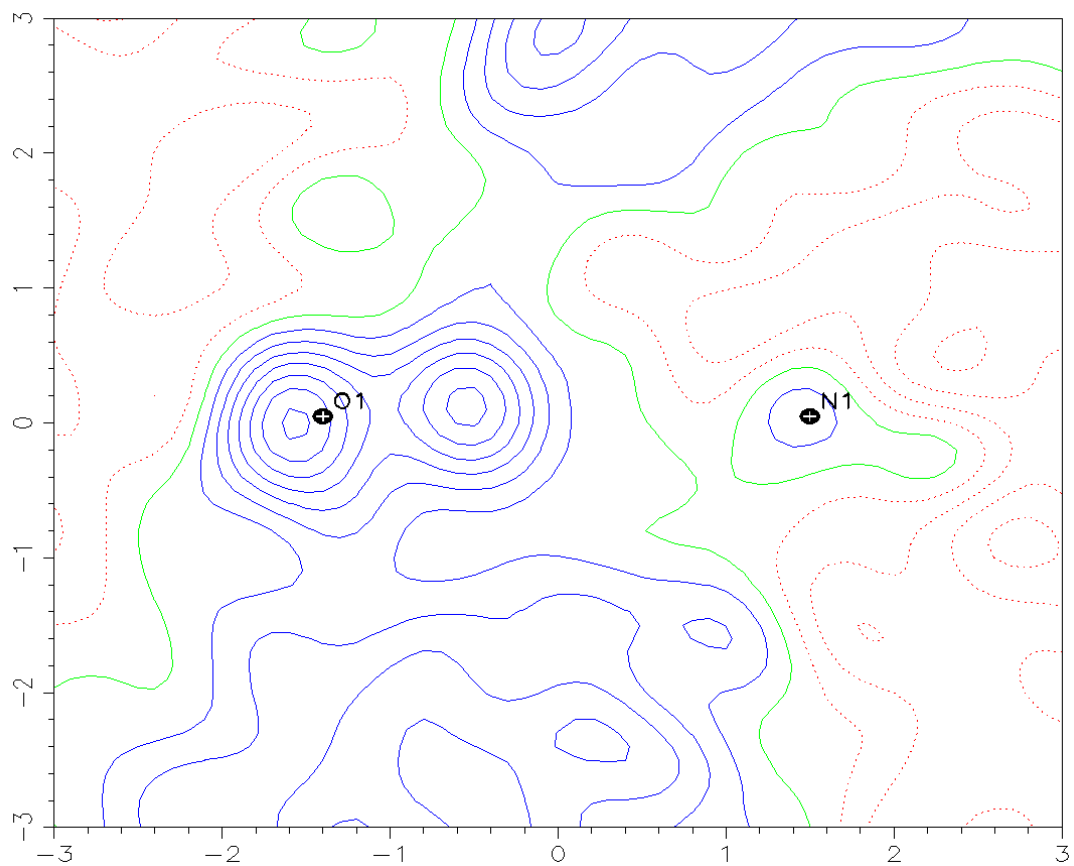

O1-H1...N1

|         | D-H   | H...A | D...A | D>H>A  |
|---------|-------|-------|-------|--------|
| Fixed   | 0.840 | 2.196 | 2.900 | 141.37 |
| Refined | 0.904 | 2.156 | 2.900 | 138.97 |

**Computational details.** Total energies computed at the B3LYP/6-311+G\*\* level of calculation (in a.u.) and cartesian coordinates (in Å) of the energy minima for the monomer and dimer species.

A comparison between the interaction energies between X-ray and optimized structures has been done with the same level of theory.

| Compound | $E_{\text{int}}$ (Kcal/mol) |           |
|----------|-----------------------------|-----------|
|          | X-ray                       | Optimized |
| <b>1</b> | 2.34                        | 5.22      |
| <b>4</b> | 6.65                        | 8.53      |

**1**<sub>monomer</sub>

E= -717.15205

|   |             |             |             |
|---|-------------|-------------|-------------|
| O | -0.70450200 | 1.98777700  | -1.29607700 |
| H | -1.54402700 | 2.45572300  | -1.37001100 |
| C | 0.49054800  | 0.26387500  | -0.11523000 |
| C | 1.92983200  | 0.97928000  | 0.37078400  |
| C | 1.93569000  | 2.46406600  | 0.70136000  |
| H | 1.36094300  | 3.03105300  | -0.03112300 |
| H | 2.96550600  | 2.82093300  | 0.67673500  |
| H | 1.53632800  | 2.65050800  | 1.69898200  |
| C | -0.75970900 | 1.18122500  | -0.12164000 |
| H | -0.66641400 | 1.82265800  | 0.76161300  |
| C | -2.08623500 | 0.44724600  | -0.00210000 |
| C | -2.69478300 | -0.13315100 | -1.11998600 |
| H | -2.20480800 | -0.08324500 | -2.08452300 |
| C | -3.92464600 | -0.77446700 | -0.99545300 |
| H | -4.38625500 | -1.22379700 | -1.86743700 |
| C | -4.55982400 | -0.84287800 | 0.24404000  |
| H | -5.51641400 | -1.34408900 | 0.33827900  |
| C | -3.96372700 | -0.25794800 | 1.35925200  |
| H | -4.45549800 | -0.29857300 | 2.32446600  |
| C | -2.73587800 | 0.38843200  | 1.23366200  |
| H | -2.27794900 | 0.84563300  | 2.10476300  |
| B | 1.94309000  | -1.63658700 | 1.29951500  |
| H | 1.99143400  | -2.36947300 | 2.22556100  |
| B | 1.74266100  | 0.54295900  | -1.28926300 |
| H | 1.60050200  | 1.40742000  | -2.06748100 |
| B | 0.80007700  | -0.96338000 | -1.26275800 |
| H | 0.00665400  | -1.14265400 | -2.11486600 |
| B | 0.42124700  | -1.36306900 | 0.42854200  |
| H | -0.63279900 | -1.79992300 | 0.71523300  |

|   |            |             |             |
|---|------------|-------------|-------------|
| B | 1.11202100 | -0.09352200 | 1.45200100  |
| H | 0.56180100 | 0.39511500  | 2.37252700  |
| B | 3.25967600 | 0.25827600  | -0.41892000 |
| H | 4.17251700 | 0.96263700  | -0.67123300 |
| B | 2.56711000 | -1.00534700 | -1.45531600 |
| H | 3.06263300 | -1.29239100 | -2.48915800 |
| B | 1.75746200 | -2.18858600 | -0.39244800 |
| H | 1.66885600 | -3.33317800 | -0.67440600 |
| B | 2.87402100 | -0.12405300 | 1.27044100  |
| H | 3.52684800 | 0.32164300  | 2.14738700  |
| B | 3.27879500 | -1.42733900 | 0.13178600  |
| H | 4.29774400 | -2.01905900 | 0.22727400  |

**1<sub>dimer</sub>**

**E= -1434.3124**

|   |            |             |             |
|---|------------|-------------|-------------|
| O | 1.07407300 | -0.13416600 | -0.44128300 |
| H | 0.21212100 | 0.04074900  | -0.02673200 |
| C | 3.44758500 | -0.32982400 | -0.08842900 |
| C | 3.77217200 | -1.93182100 | -0.47374100 |
| C | 2.69770900 | -2.97942200 | -0.22542400 |
| H | 2.72268800 | -3.33373900 | 0.80556800  |
| H | 2.88214600 | -3.82966600 | -0.88237500 |
| H | 1.70730000 | -2.58513700 | -0.45090400 |
| C | 2.06791100 | -0.05653900 | 0.56680700  |
| H | 1.91879400 | -0.86390200 | 1.29339200  |
| C | 1.98834500 | 1.25405200  | 1.34118200  |
| C | 1.71328500 | 2.46061300  | 0.68784900  |
| H | 1.59585200 | 2.46945000  | -0.38877900 |
| C | 1.59255600 | 3.64371700  | 1.41495800  |
| H | 1.38680000 | 4.57399300  | 0.89714500  |
| C | 1.74476500 | 3.63525300  | 2.80188200  |
| H | 1.65325700 | 4.55672600  | 3.36562700  |
| C | 2.01362200 | 2.43625000  | 3.45859700  |
| H | 2.12802100 | 2.41947200  | 4.53657500  |
| C | 2.12906100 | 1.25295100  | 2.73102100  |
| H | 2.33215300 | 0.32170200  | 3.24962400  |
| B | 4.54955200 | -1.21814500 | 0.89587300  |
| H | 4.16905200 | -1.55289100 | 1.96000500  |
| B | 4.88040600 | 0.45791100  | 0.43275600  |
| H | 4.77977300 | 1.29631300  | 1.25268700  |
| B | 4.22445800 | 0.71177100  | -1.19983000 |
| H | 3.69061600 | 1.72385000  | -1.48156600 |
| B | 3.49965400 | -0.81066800 | -1.75910100 |
| H | 2.49326400 | -0.89221000 | -2.35333800 |
| B | 5.42313600 | -2.28874600 | -0.21313600 |
| H | 5.68200000 | -3.37805300 | 0.16142500  |
| B | 6.15905700 | -0.77105300 | 0.34455400  |
| H | 7.06020200 | -0.76857600 | 1.10947900  |
| B | 5.96854300 | 0.43182600  | -0.96558000 |
| H | 6.74549900 | 1.30689200  | -1.13429400 |

|   |             |             |             |
|---|-------------|-------------|-------------|
| B | 5.10760900  | -0.35044300 | -2.31759400 |
| H | 5.26496900  | -0.04906600 | -3.44967200 |
| B | 4.78256100  | -2.02969900 | -1.84656100 |
| H | 4.61238300  | -2.94945200 | -2.56622800 |
| B | 6.30995200  | -1.26888100 | -1.36491200 |
| H | 7.33653300  | -1.62920400 | -1.82750600 |
| O | -1.35169700 | 0.83372900  | 0.77605300  |
| H | -1.00564800 | 1.72643400  | 0.91152000  |
| C | -3.27912800 | -0.49202700 | 0.17184700  |
| C | -3.77134400 | -1.30740500 | 1.56154400  |
| C | -3.58222600 | -0.63610700 | 2.91299300  |
| H | -2.61638900 | -0.13412000 | 2.97417000  |
| H | -3.61371400 | -1.40213700 | 3.68804200  |
| H | -4.37744800 | 0.08234600  | 3.11419000  |
| C | -2.72429300 | 0.94013700  | 0.37495900  |
| H | -3.29288300 | 1.37225200  | 1.20364900  |
| C | -2.89405600 | 1.86740100  | -0.81747900 |
| C | -2.01149600 | 1.83323200  | -1.90213300 |
| H | -1.19240600 | 1.12520500  | -1.91477900 |
| C | -2.18103900 | 2.71086000  | -2.96973900 |
| H | -1.49324000 | 2.67493500  | -3.80679700 |
| C | -3.22985200 | 3.63011700  | -2.96597100 |
| H | -3.35914300 | 4.31071500  | -3.79970800 |
| C | -4.10558700 | 3.67583500  | -1.88376500 |
| H | -4.91765100 | 4.39368600  | -1.86876200 |
| C | -3.93310300 | 2.80177600  | -0.81256400 |
| H | -4.61522300 | 2.84533100  | 0.03023700  |
| B | -5.50328100 | -2.02266800 | -0.48677200 |
| H | -6.61105600 | -2.04667500 | -0.89691700 |
| B | -2.35493800 | -1.84769500 | 0.74446000  |
| H | -1.32133300 | -1.64898200 | 1.26202000  |
| B | -2.69098800 | -1.60388600 | -0.98408900 |
| H | -1.80579000 | -1.26255400 | -1.68270200 |
| B | -4.31056300 | -0.88550300 | -1.14357300 |
| H | -4.51637500 | -0.04961700 | -1.94476300 |
| B | -4.96336400 | -0.65982500 | 0.48895000  |
| H | -5.54018000 | 0.30064700  | 0.85356400  |
| B | -3.54445600 | -2.99018800 | 1.38531000  |
| H | -3.25249100 | -3.58955600 | 2.35909000  |
| B | -2.87502900 | -3.21037700 | -0.24374400 |
| H | -2.11261600 | -4.08169700 | -0.48061600 |
| B | -4.09165600 | -2.62250900 | -1.41014200 |
| H | -4.19583800 | -3.07712200 | -2.49583000 |
| B | -5.15235600 | -2.25515900 | 1.23907800  |
| H | -5.94023000 | -2.36373400 | 2.11120100  |
| B | -4.61810300 | -3.47603400 | 0.06102200  |
| H | -5.10304600 | -4.55356400 | 0.04370100  |

4<sub>monomer</sub>  
E= -733.18930

|   |             |             |             |
|---|-------------|-------------|-------------|
| C | -0.48487100 | 0.25937000  | 0.24370900  |
| C | -1.82200900 | 1.00095400  | -0.49767300 |
| C | 0.78118700  | 1.14269400  | 0.47838800  |
| H | 0.68387300  | 2.00959800  | -0.18378700 |
| C | 2.08511200  | 0.44574800  | 0.12660500  |
| C | 2.78751200  | -0.29264100 | 1.07827500  |
| H | 2.41803100  | -0.38195900 | 2.09100200  |
| C | 3.98357200  | -0.89977300 | 0.70473900  |
| H | 4.54746600  | -1.48067700 | 1.42881500  |
| N | 4.51060500  | -0.81698200 | -0.52120500 |
| C | 3.83805300  | -0.09743700 | -1.42209100 |
| H | 4.28259300  | -0.02867500 | -2.41087200 |
| C | 2.63533700  | 0.55180400  | -1.14923800 |
| H | 2.14953900  | 1.13115400  | -1.92573700 |
| C | -1.73208700 | 2.46031700  | -0.91647800 |
| H | -1.43013100 | 3.10437200  | -0.08971900 |
| H | -2.72012200 | 2.78368500  | -1.24440300 |
| H | -1.04060300 | 2.59753800  | -1.74795500 |
| B | -1.88370600 | 0.64755800  | 1.18128700  |
| H | -1.82745700 | 1.56122400  | 1.92768000  |
| B | -1.01864100 | -0.89098300 | 1.39268100  |
| H | -0.36445400 | -1.03241300 | 2.36193800  |
| B | -0.41374600 | -1.39753200 | -0.19966800 |
| H | 0.64930000  | -1.88771700 | -0.30863600 |
| B | -0.88792700 | -0.15472200 | -1.37633500 |
| H | -0.19935200 | 0.25961000  | -2.23621100 |
| B | -3.27969800 | 0.37249400  | 0.13030300  |
| H | -4.18654200 | 1.12287300  | 0.21367600  |
| B | -2.79647600 | -0.85196700 | 1.32436400  |
| H | -3.44861300 | -1.05400000 | 2.28833900  |
| B | -1.89181900 | -2.12359600 | 0.45419000  |
| H | -1.89804400 | -3.25111800 | 0.80704800  |
| B | -1.80082500 | -1.66187700 | -1.27153800 |
| H | -1.74771000 | -2.44388200 | -2.15520500 |
| B | -2.66293200 | -0.12157600 | -1.46050300 |
| H | -3.16024600 | 0.29117500  | -2.44802000 |
| B | -3.28496400 | -1.34092800 | -0.32682700 |
| H | -4.30308400 | -1.90043500 | -0.54222800 |
| O | 0.89373100  | 1.57447200  | 1.82228600  |
| H | 0.04430800  | 1.91216700  | 2.12724100  |

**4<sub>dimer</sub>**

**E= -1466.39219**

|   |            |             |             |
|---|------------|-------------|-------------|
| C | 5.28365200 | -0.22751400 | 0.26257200  |
| C | 6.55832100 | -0.88400800 | -0.64743000 |
| C | 4.27719600 | -1.23417700 | 0.90080800  |
| H | 4.40984300 | -2.18574000 | 0.37524200  |
| C | 2.82064300 | -0.82954100 | 0.73951200  |
| C | 2.18581800 | -0.03144500 | 1.69138800  |
| H | 2.72181600 | 0.32141000  | 2.56176800  |

|   |             |             |             |
|---|-------------|-------------|-------------|
| C | 0.84724100  | 0.29382900  | 1.50823200  |
| H | 0.33212600  | 0.91999600  | 2.22978500  |
| N | 0.12253200  | -0.12831000 | 0.46362800  |
| C | 0.73266100  | -0.89962400 | -0.44339600 |
| H | 0.12537200  | -1.23102200 | -1.27961100 |
| C | 2.06806100  | -1.27684900 | -0.34434100 |
| H | 2.50044600  | -1.91479600 | -1.10579400 |
| C | 6.65353400  | -2.39127000 | -0.82478900 |
| H | 6.64631800  | -2.91644800 | 0.13119700  |
| H | 7.59828500  | -2.61830000 | -1.31919400 |
| H | 5.84732800  | -2.77384700 | -1.45106200 |
| B | 6.88610700  | -0.23246500 | 0.90799000  |
| H | 7.14364500  | -0.99852000 | 1.76951000  |
| B | 5.81437100  | 1.17378000  | 1.08930300  |
| H | 5.34895200  | 1.38492200  | 2.15084900  |
| B | 4.82587200  | 1.29574400  | -0.38189900 |
| H | 3.69028200  | 1.59484100  | -0.31703200 |
| B | 5.27460200  | -0.05135100 | -1.44759300 |
| H | 4.51423700  | -0.70783500 | -2.06134000 |
| B | 7.97108900  | 0.05376100  | -0.45809700 |
| H | 8.99682900  | -0.52881100 | -0.47470900 |
| B | 7.52045700  | 1.38533200  | 0.62979900  |
| H | 8.30195000  | 1.84730400  | 1.38514500  |
| B | 6.24667700  | 2.33738400  | -0.18519900 |
| H | 6.11553900  | 3.49734300  | -0.00518600 |
| B | 5.90164000  | 1.56976000  | -1.76470500 |
| H | 5.53125800  | 2.16496400  | -2.71493700 |
| B | 6.97302400  | 0.16218200  | -1.92346400 |
| H | 7.33066000  | -0.34221100 | -2.92828300 |
| B | 7.57633600  | 1.64131900  | -1.14163000 |
| H | 8.41271200  | 2.29706500  | -1.65710400 |
| O | 4.49711000  | -1.41437300 | 2.28714800  |
| H | 5.43735200  | -1.54604800 | 2.45279000  |
| C | -4.41410700 | -0.39600000 | -0.13170800 |
| C | -4.19715500 | -1.85863300 | 0.68246600  |
| C | -3.46943400 | 0.79246600  | 0.25683700  |
| H | -3.19173000 | 0.63304300  | 1.30354400  |
| C | -4.16910300 | 2.14377800  | 0.17973600  |
| C | -4.12396700 | 2.90704900  | -0.98627100 |
| H | -3.59009300 | 2.54951100  | -1.85654000 |
| C | -4.76112900 | 4.14462300  | -1.00301200 |
| H | -4.74183800 | 4.75408600  | -1.90223400 |
| N | -5.41492300 | 4.66207100  | 0.04291000  |
| C | -5.44143900 | 3.93085700  | 1.15963600  |
| H | -5.96669600 | 4.36556300  | 2.00574800  |
| C | -4.83906700 | 2.67974800  | 1.27824400  |
| H | -4.89830500 | 2.14179600  | 2.21784000  |
| C | -3.12013600 | -1.96051300 | 1.75124700  |
| H | -2.14657700 | -1.64581800 | 1.37443700  |
| H | -3.04084000 | -3.00256900 | 2.06236300  |

|   |             |             |             |
|---|-------------|-------------|-------------|
| H | -3.37391700 | -1.36706100 | 2.63043400  |
| B | -3.69225200 | -1.73763400 | -0.95848200 |
| H | -2.53819500 | -1.70926100 | -1.16950600 |
| B | -4.89146100 | -0.69097900 | -1.74414100 |
| H | -4.51901200 | 0.06136300  | -2.57067000 |
| B | -6.07573200 | -0.18301400 | -0.52045200 |
| H | -6.50277500 | 0.91233300  | -0.52132300 |
| B | -5.58539900 | -0.89305600 | 1.02654500  |
| H | -5.60109300 | -0.33295600 | 2.06325000  |
| B | -4.52319000 | -3.17761100 | -0.34841200 |
| H | -3.87858800 | -4.15301800 | -0.18200200 |
| B | -4.99071500 | -2.46018200 | -1.90326200 |
| H | -4.74066900 | -2.99900700 | -2.92530300 |
| B | -6.47277500 | -1.50379300 | -1.62993700 |
| H | -7.28908400 | -1.35307000 | -2.47141900 |
| B | -6.90085700 | -1.62248400 | 0.10295000  |
| H | -8.00852800 | -1.56192800 | 0.51064900  |
| B | -5.69123400 | -2.65973800 | 0.88295600  |
| H | -5.83155100 | -3.28714900 | 1.87345800  |
| B | -6.24208900 | -3.03973300 | -0.76239600 |
| H | -6.88923600 | -4.00637500 | -0.97368300 |
| O | -2.32718600 | 0.82396500  | -0.56129900 |
| H | -1.54075800 | 0.47041100  | -0.09137600 |
